# Supplementary material
Source: PubMed Central journal article supplement (PMC7114146)
Supplement: ao9b02133_si_001.pdf [file ao9b02133_si_001.pdf]

**Synthesis of metal-organic frameworks MIL-101(Cr)-NH<sub>2</sub> containing phosphorous acid functional groups: Application for the synthesis of *N*-amino-2-pyridone and pyrano [2,3-*c*]pyrazole derivatives *via* a cooperative vinylogous anomeric based oxidation**

Saeed Babae,<sup>a</sup> Mahmoud Zarei,<sup>\*a</sup> Hassan Sepehrmansourie,<sup>a</sup> Mohammad Ali Zolfigol,<sup>\*a</sup> Sadegh Rostamnia<sup>\*b</sup>

<sup>a</sup> Department of Organic Chemistry, Faculty of Chemistry, Bu-Ali Sina University, Hamedan 6517838683, Tel: +988138282807, Fax: +988138380709 Iran. E-Mail: zolfi@basu.ac.ir&mzolfigol@yahoo.com.

<sup>b</sup> Organic and Nano Group (ONG), Department of Chemistry, Faculty of Science, University of Maragheh, PO Box 55181-83111, Maragheh, Iran. E-Mail: srostamnia@gmail.com.

|                                                                                                                                       |    |
|---------------------------------------------------------------------------------------------------------------------------------------|----|
| 1,6-diamino-2-oxo-4-phenyl-1,2-dihydropyridine-3,5-dicarbonitrile (6a).....                                                           | 4  |
| 1,6-diamino-4-(4-hydroxyphenyl)-2-oxo-1,2-dihydropyridine-3,5-dicarbonitrile (6f).....                                                | 4  |
| 1,6-diamino-2-oxo-1,2-dihydro-[4,4'-bipyridine]-3,5-dicarbonitrile (6g).....                                                          | 4  |
| 1',6'-diamino-2'-oxo-1',2'-dihydro-[3,4'-bipyridine]-3',5'-dicarbonitrile (6h).....                                                   | 4  |
| 1,6-diamino-2-oxo-4-(thiophen-2-yl)-1,2-dihydropyridine-3,5-dicarbonitrile (6i).....                                                  | 5  |
| 1,6-diamino-4-(4-(dimethylamino)phenyl)-2-oxo-1,2-dihydropyridine-3,5-dicarbonitrile (6k) ....                                        | 5  |
| 1,6-diamino-4-(1H-indol-3-yl)-2-oxo-1,2-dihydropyridine-3,5-dicarbonitrile (6l) .....                                                 | 5  |
| 6-amino-4-(4-(dimethylamino)phenyl)-3-methyl-1,4-dihydropyrano[2,3-c]pyrazole-5-<br>carbonitrile (7g) .....                           | 5  |
| 6-amino-4-(2-hydroxy-3-methoxyphenyl)-3-methyl-1,4-dihydropyrano[2,3-c]pyrazole-5-<br>carbonitrile (7m) .....                         | 6  |
| Figure S1: FT-IR spectrum of 1,6-diamino-2-oxo-4-phenyl-1,2-dihydropyridine-3,5-<br>dicarbonitrile (6a).....                          | 7  |
| Figure S2: <sup>1</sup> H NMR spectrum of 1,6-diamino-2-oxo-4-phenyl-1,2-dihydropyridine-3,5-<br>dicarbonitrile (6a).....             | 8  |
| Figure S3: FT-IR spectrum of 1,6-diamino-4-(4-hydroxyphenyl)-2-oxo-1,2-dihydropyridine-<br>3,5-dicarbonitrile (6f).....               | 9  |
| Figure S4: <sup>1</sup> H NMR spectrum of 1,6-diamino-4-(4-hydroxyphenyl)-2-oxo-1,2-<br>dihydropyridine-3,5-dicarbonitrile (6f).....  | 10 |
| Figure S5: <sup>13</sup> C NMR spectrum of 1,6-diamino-4-(4-hydroxyphenyl)-2-oxo-1,2-<br>dihydropyridine-3,5-dicarbonitrile (6f)..... | 11 |
| Figure S6: FT-IR spectrum of 1,6-diamino-2-oxo-1,2-dihydro-[4,4'-bipyridine]-3,5-<br>dicarbonitrile (6g) .....                        | 12 |
| Figure S7: <sup>1</sup> H NMR spectrum of 1,6-diamino-2-oxo-1,2-dihydro-[4,4'-bipyridine]-3,5-<br>dicarbonitrile (6g) .....           | 13 |
| Figure S8: <sup>13</sup> C NMR spectrum of 1,6-diamino-2-oxo-1,2-dihydro-[4,4'-bipyridine]-3,5-<br>dicarbonitrile (6g) .....          | 14 |
| Figure S9: FT-IR spectrum of 1',6'-diamino-2'-oxo-1',2'-dihydro-[3,4'-bipyridine]-3',5'-<br>dicarbonitrile (6h) .....                 | 15 |
| Figure S10: <sup>1</sup> H NMR spectrum of 1',6'-diamino-2'-oxo-1',2'-dihydro-[3,4'-bipyridine]-3',5'-<br>dicarbonitrile (6h) .....   | 16 |
| Figure S11: <sup>13</sup> C NMR spectrum of 1',6'-diamino-2'-oxo-1',2'-dihydro-[3,4'-bipyridine]-3',5'-<br>dicarbonitrile (6h) .....  | 17 |
| Figure S12: FT-IR spectrum of 1,6-diamino-2-oxo-4-(thiophen-2-yl)-1,2-dihydropyridine-3,5-<br>dicarbonitrile (6i) .....               | 18 |

|                                                                                                                                                      |    |
|------------------------------------------------------------------------------------------------------------------------------------------------------|----|
| Figure S13: <sup>1</sup> H NMR spectrum of 1,6-diamino-2-oxo-4-(thiophen-2-yl)-1,2-dihydropyridine-3,5-dicarbonitrile (6i) .....                     | 19 |
| Figure S14: <sup>13</sup> C NMR spectrum of 1,6-diamino-2-oxo-4-(thiophen-2-yl)-1,2-dihydropyridine-3,5-dicarbonitrile (6i) .....                    | 20 |
| Figure S15: FT-IR spectrum of 1,6-diamino-4-(4-(dimethylamino)phenyl)-2-oxo-1,2-dihydropyridine-3,5-dicarbonitrile (6k) .....                        | 21 |
| Figure S16: <sup>1</sup> H NMR spectrum of 1,6-diamino-4-(4-(dimethylamino)phenyl)-2-oxo-1,2-dihydropyridine-3,5-dicarbonitrile (6k) .....           | 22 |
| Figure S17: <sup>13</sup> C NMR spectrum of 1,6-diamino-4-(4-(dimethylamino)phenyl)-2-oxo-1,2-dihydropyridine-3,5-dicarbonitrile (6k) .....          | 23 |
| Figure S18: FT-IR spectrum of 1,6-diamino-4-(1H-indol-3-yl)-2-oxo-1,2-dihydropyridine-3,5-dicarbonitrile (6l) .....                                  | 24 |
| Figure S19: <sup>1</sup> H NMR spectrum of 1,6-diamino-4-(1H-indol-3-yl)-2-oxo-1,2-dihydropyridine-3,5-dicarbonitrile (6l) .....                     | 25 |
| Figure S20: <sup>13</sup> C NMR spectrum of 1,6-diamino-4-(1H-indol-3-yl)-2-oxo-1,2-dihydropyridine-3,5-dicarbonitrile (6l) .....                    | 26 |
| Figure S21: FT-IR spectrum of 6-amino-4-(4-(dimethylamino)phenyl)-3-methyl-1,4-dihydropyran[2,3-c]pyrazole-5-carbonitrile (7g) .....                 | 27 |
| Figure S22: <sup>1</sup> H NMR spectrum of 6-amino-4-(4-(dimethylamino)phenyl)-3-methyl-1,4-dihydropyran[2,3-c]pyrazole-5-carbonitrile (7g) .....    | 28 |
| Figure S23: <sup>13</sup> C NMR spectrum of 6-amino-4-(4-(dimethylamino)phenyl)-3-methyl-1,4-dihydropyran[2,3-c]pyrazole-5-carbonitrile (7g) .....   | 29 |
| Figure S24: FT-IR spectrum of 6-amino-4-(2-hydroxy-3-methoxyphenyl)-3-methyl-1,4-dihydropyran[2,3-c]pyrazole-5-carbonitrile (7m) .....               | 30 |
| Figure S25: <sup>1</sup> H NMR spectrum of 6-amino-4-(2-hydroxy-3-methoxyphenyl)-3-methyl-1,4-dihydropyran[2,3-c]pyrazole-5-carbonitrile (7m) .....  | 31 |
| Figure S26: <sup>13</sup> C NMR spectrum of 6-amino-4-(2-hydroxy-3-methoxyphenyl)-3-methyl-1,4-dihydropyran[2,3-c]pyrazole-5-carbonitrile (7m) ..... | 32 |

**1,6-diamino-2-oxo-4-phenyl-1,2-dihydropyridine-3,5-dicarbonitrile (6a)**

White solid; Mp: 237-240 °C; FT-IR (KBr):  $\nu$  (cm<sup>-1</sup>) = 3446, 2400, 3308, 3248, 2218, 2206, 1639, 1617, 1599. <sup>1</sup>H NMR (400 MHz, DMSO-*d*<sub>6</sub>)  $\delta$  (ppm): 8.24 (s, 2H), 7.41 – 7.29 (m, 5H), 5.49 (s, 2H).

**1,6-diamino-4-(4-hydroxyphenyl)-2-oxo-1,2-dihydropyridine-3,5-dicarbonitrile (6f)**

White solid; Mp: 325-327 °C; FT-IR (KBr):  $\nu$  (cm<sup>-1</sup>) = 3447, 3310, 3209, 2213, 2195, 1696, 1606. <sup>1</sup>H NMR (400 MHz, DMSO-*d*<sub>6</sub>)  $\delta$  (ppm): 8.61 (s, 3H), 7.38 (d, *J* = 8.4 Hz, 2H), 6.94 (d, *J* = 8.5 Hz, 2H), 5.68 (s, 2H). <sup>13</sup>C NMR (100 MHz, DMSO)  $\delta$  (ppm): 159.6, 159.4, 159.2, 156.6, 129.8, 124.8, 116.7, 115.8, 115.2, 115.2, 86.1, 74.1.

**1,6-diamino-2-oxo-1,2-dihydro-[4,4'-bipyridine]-3,5-dicarbonitrile (6g)**

White solid; Mp: 337-339 °C; FT-IR (KBr):  $\nu$  (cm<sup>-1</sup>) = 3530, 3345, 3291, 3213, 3102, 2219, 1683, 1653, 1460. <sup>1</sup>H NMR (400 MHz, DMSO-*d*<sub>6</sub>)  $\delta$  (ppm): 8.87 (dd, *J* = 4.4, 1.6 Hz, 2H), 8.51 (s, 2H), 7.61 (dd, *J* = 4.4, 1.6 Hz, 2H), 5.78 (s, 2H). <sup>13</sup>C NMR (100 MHz, DMSO)  $\delta$  (ppm): 159.0, 156.9, 156.6, 150.1, 142.3, 122.5, 115.8, 115.0, 85.9, 73.8.

**1',6'-diamino-2'-oxo-1',2'-dihydro-[3,4'-bipyridine]-3',5'-dicarbonitrile (6h)**

White solid; Mp: 311-312 °C; FT-IR (KBr):  $\nu$  (cm<sup>-1</sup>) = 3334, 3286, 3170, 3064, 2228, 2209, 1681, 1622. <sup>1</sup>H NMR (400 MHz, DMSO-*d*<sub>6</sub>)  $\delta$  (ppm): 8.84 (dd, *J* = 4.9, 1.6 Hz, 1H), 8.80 (dd, *J* = 2.3, 0.9 Hz, 1H), 8.49 (s, 2H), 8.08 (dt, *J* = 7.9, 1.9 Hz, 1H), 7.70 (ddd, *J* = 7.9, 4.9, 0.9 Hz, 1H), 5.79 (s, 2H). <sup>13</sup>C NMR (100 MHz, DMSO)  $\delta$  (ppm): 159.0, 156.6, 156.3, 151.1, 148.0, 136.0, 130.7, 123.5, 116.2, 115.3, 86.6, 74.5.

**1,6-diamino-2-oxo-4-(thiophen-2-yl)-1,2-dihydropyridine-3,5-dicarbonitrile (6i)**

White solid; Mp: 300 °C; FT-IR (KBr):  $\nu$  (cm<sup>-1</sup>) = 3397, 3306, 3250, 2210, 1639, 1614, 1091. <sup>1</sup>H NMR (400 MHz, DMSO-*d*<sub>6</sub>)  $\delta$  (ppm): 8.37 (s, 2H), 7.99 (dd, *J* = 5.0, 1.3 Hz, 1H), 7.58 (dd, *J* = 3.7, 1.3 Hz, 1H), 7.33 (dd, *J* = 5.1, 3.7 Hz, 1H), 5.72 (s, 2H). <sup>13</sup>C NMR (100 MHz, DMSO)  $\delta$  (ppm): 159.2, 156.7, 151.6, 133.3, 130.7, 130.3, 127.7, 116.4, 115.6, 86.4, 74.2.

**1,6-diamino-4-(4-(dimethylamino)phenyl)-2-oxo-1,2-dihydropyridine-3,5-dicarbonitrile (6k)**

White solid; Mp: 249-251 °C; FT-IR (KBr):  $\nu$  (cm<sup>-1</sup>) = 3379, 3314, 3263, 2185, 3017, 2214, 2191, 1643, 1603. <sup>1</sup>H NMR (400 MHz, DMSO-*d*<sub>6</sub>)  $\delta$  (ppm): 8.29 (s, 2H), 7.46 (d, *J* = 8.9 Hz, 2H), 6.90 (d, *J* = 8.8 Hz, 2H), 5.71 (s, 2H), 3.10 (s, 6H). <sup>13</sup>C NMR (100 MHz, DMSO)  $\delta$  (ppm): 159.6, 159.5, 156.8, 151.5, 129.5, 120.4, 117.1, 116.2, 111.1, 85.4, 73.6, 39.6.

**1,6-diamino-4-(1H-indol-3-yl)-2-oxo-1,2-dihydropyridine-3,5-dicarbonitrile (6l)**

White solid; Mp: >350 °C; FT-IR (KBr):  $\nu$  (cm<sup>-1</sup>) = 3435, 3359, 3318, 3270, 3127, 2210, 1654, 1628. <sup>1</sup>H NMR (400 MHz, DMSO-*d*<sub>6</sub>)  $\delta$  (ppm): 11.93 (s, 1H), 8.34 (s, 2H), 7.90 (s, 1H), 7.58 – 7.52 (m, 2H), 7.29 (td, *J* = 8.4, 1.2 Hz, 1H), 7.20 (td, *J* = 8.4, 1.2 Hz, 1H), 5.71 (s, 2H). <sup>13</sup>C NMR (100 MHz, DMSO)  $\delta$  (ppm): 159.7, 156.9, 153.6, 136.0, 127.6, 124.5, 122.1, 120.0, 120.0, 117.2, 116.3, 112.2, 108.8, 86.1, 74.3.

**6-amino-4-(4-(dimethylamino)phenyl)-3-methyl-1,4-dihydropyrano[2,3-c]pyrazole-5-carbonitrile (7g)**

White solid; Mp: 168-170 °C; FT-IR (KBr):  $\nu$  (cm<sup>-1</sup>) = 3385, 3305, 3172, 2918, 2189, 1645. <sup>1</sup>H

NMR (400 MHz, DMSO-*d*<sub>6</sub>)  $\delta$  (ppm): 7.65 (d, *J* = 8.5 Hz, 1H), 6.97 (d, *J* = 8.1 Hz, 2H), 6.77 (d, *J* = 10.7 Hz, 3H), 6.66 (d, *J* = 8.2 Hz, 2H), 4.46 (s, 1H), 2.87 (s, 6H), 1.79 (s, 3H). <sup>13</sup>C NMR (100 MHz, DMSO)  $\delta$  (ppm): 160.5, 159.8, 154.7, 151.9, 149.2, 135.5, 132.0, 129.5, 127.9, 120.9, 112.3, 111.6, 98.1, 58.0, 40.1, 35.3, 9.7.

**6-amino-4-(2-hydroxy-3-methoxyphenyl)-3-methyl-1,4-dihydropyrano[2,3-c]pyrazole-5-carbonitrile (7m)**

White solid; Mp: 228-230 °C; FT-IR (KBr):  $\nu$  (cm<sup>-1</sup>) = 3498, 3272, 3321, 3245, 3002, 2190,

1661. <sup>1</sup>H NMR (400 MHz, DMSO-*d*<sub>6</sub>)  $\delta$  (ppm): 11.19 (s, 1H), 9.46 (s, 1H), 7.11 (t, *J* = 7.8 Hz, 1H), 7.02 (d, *J* = 8.1 Hz, 1H), 6.85 (s, 2H), 6.71 (d, *J* = 7.7 Hz, 1H), 4.74 (s, 1H), 3.94 (s, 3H), 2.10 (s, 3H). <sup>13</sup>C NMR (100 MHz, DMSO)  $\delta$  (ppm): 160.0, 146.6, 137.8, 124.1, 123.9, 120.9, 120.0, 110.0, 104.9, 55.5, 54.9, 28.7, 9.8.

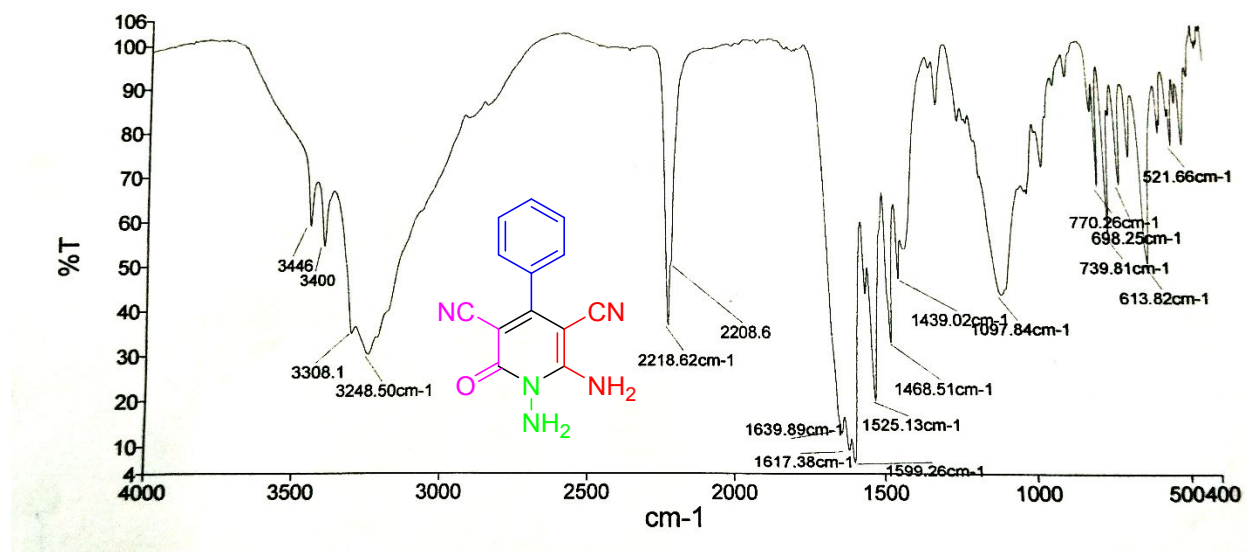

Figure S1: FT-IR spectrum of 1,6-diamino-2-oxo-4-phenyl-1,2-dihydropyridine-3,5-dicarbonitrile (6a)

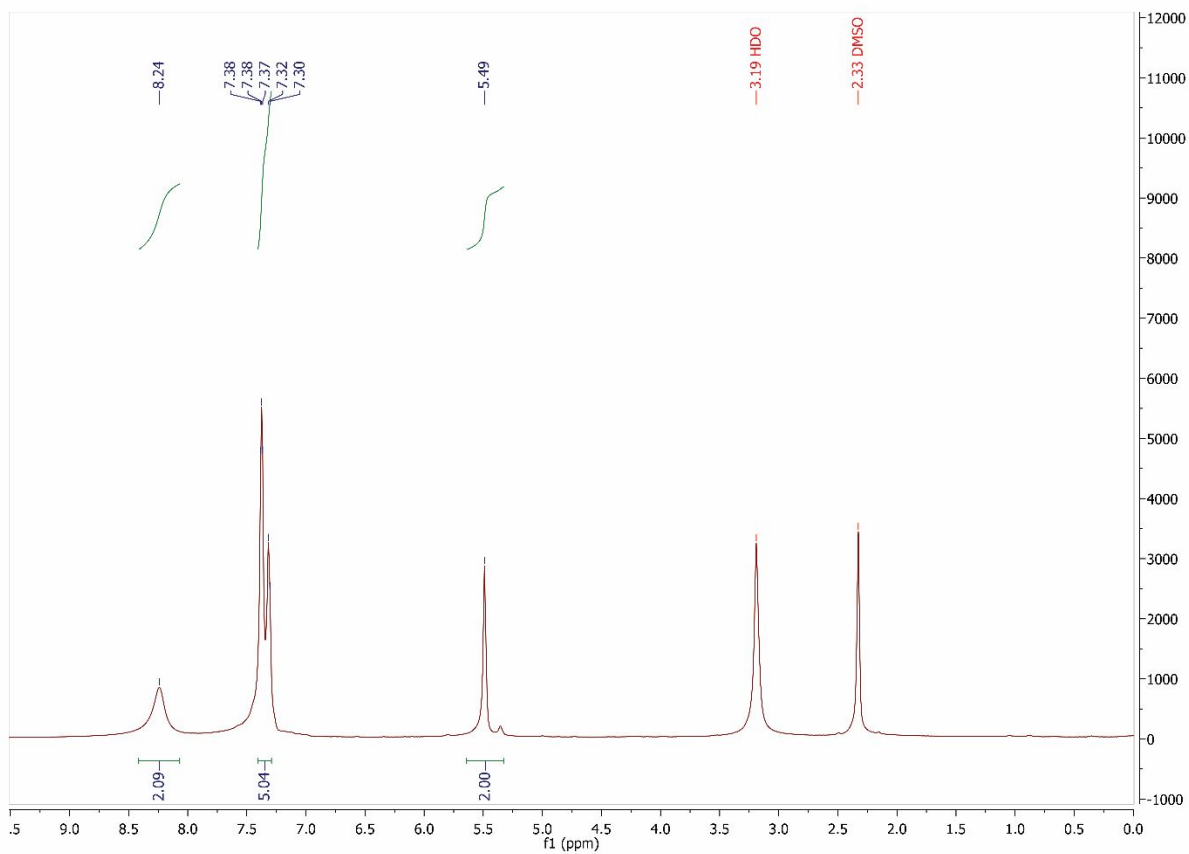

Figure S2: <sup>1</sup>H NMR spectrum of 1,6-diamino-2-oxo-4-phenyl-1,2-dihydropyridine-3,5-dicarbonitrile (6a)



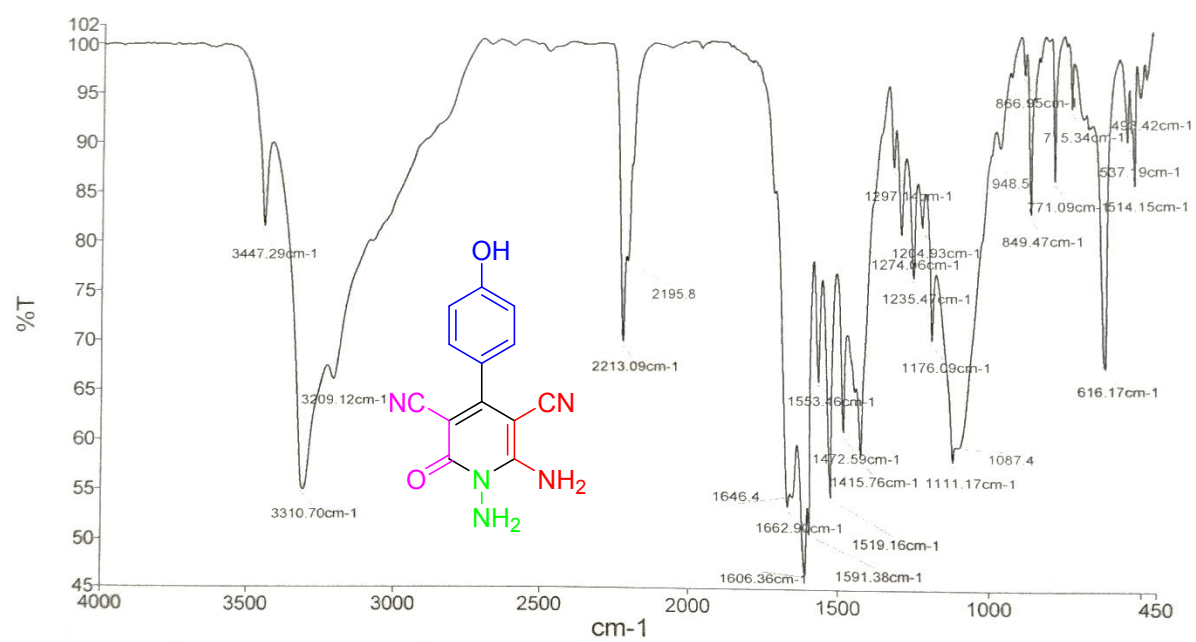

Figure S3: FT-IR spectrum of 1,6-diamino-4-(4-hydroxyphenyl)-2-oxo-1,2-dihydropyridine-3,5-dicarbonitrile (6f)

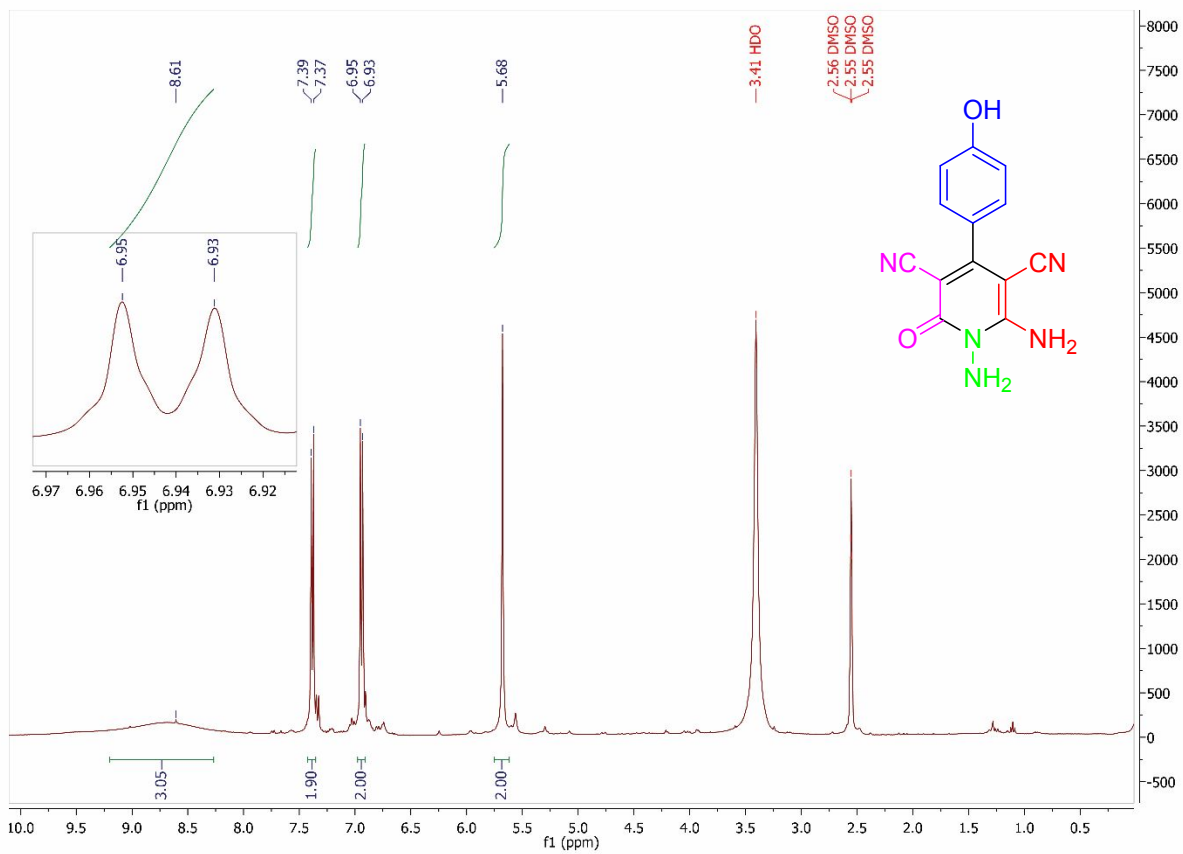

Figure S4: <sup>1</sup>H NMR spectrum of 1,6-diamino-4-(4-hydroxyphenyl)-2-oxo-1,2-dihydropyridine-3,5-dicarbonitrile (6f)

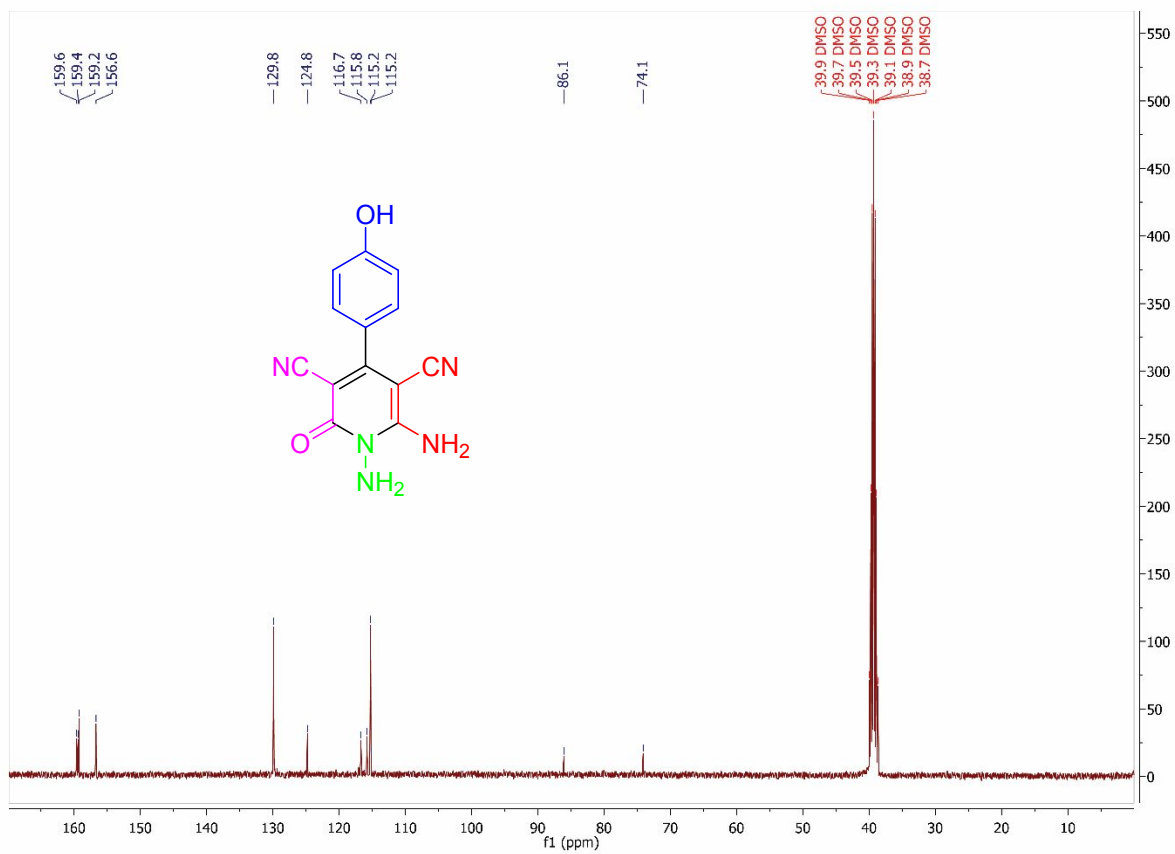

Figure S5:  $^{13}\text{C}$  NMR spectrum of 1,6-diamino-4-(4-hydroxyphenyl)-2-oxo-1,2-dihydropyridine-3,5-dicarbonitrile (6f)

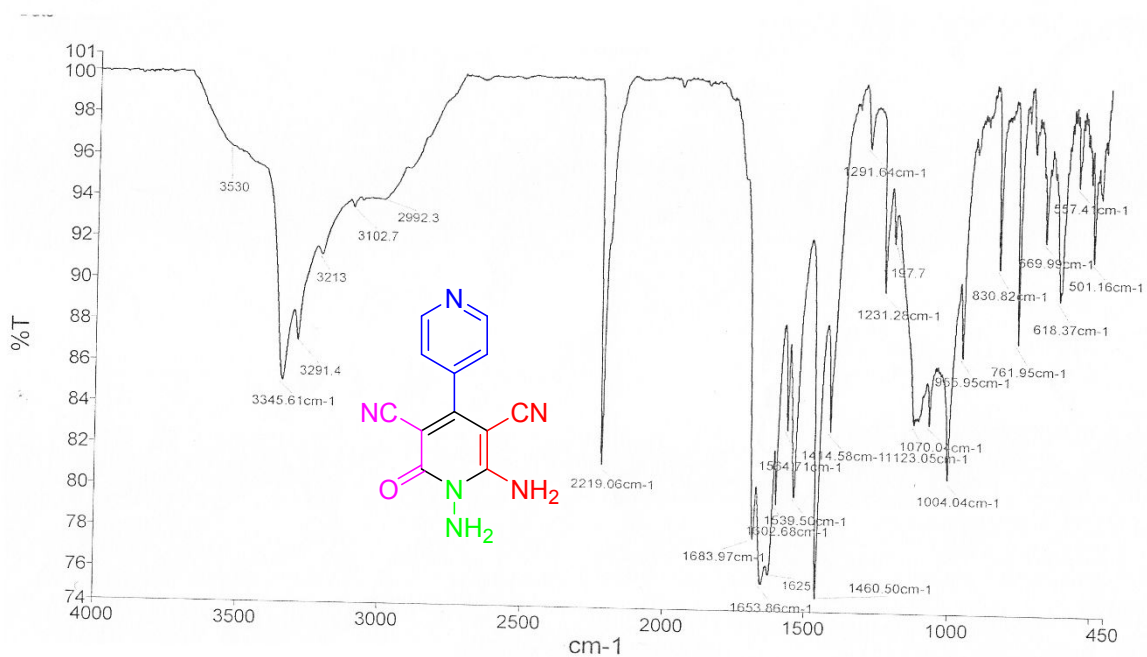

Figure S6: FT-IR spectrum of 1,6-diamino-2-oxo-1,2-dihydro-[4,4'-bipyridine]-3,5-dicarbonitrile (6g)

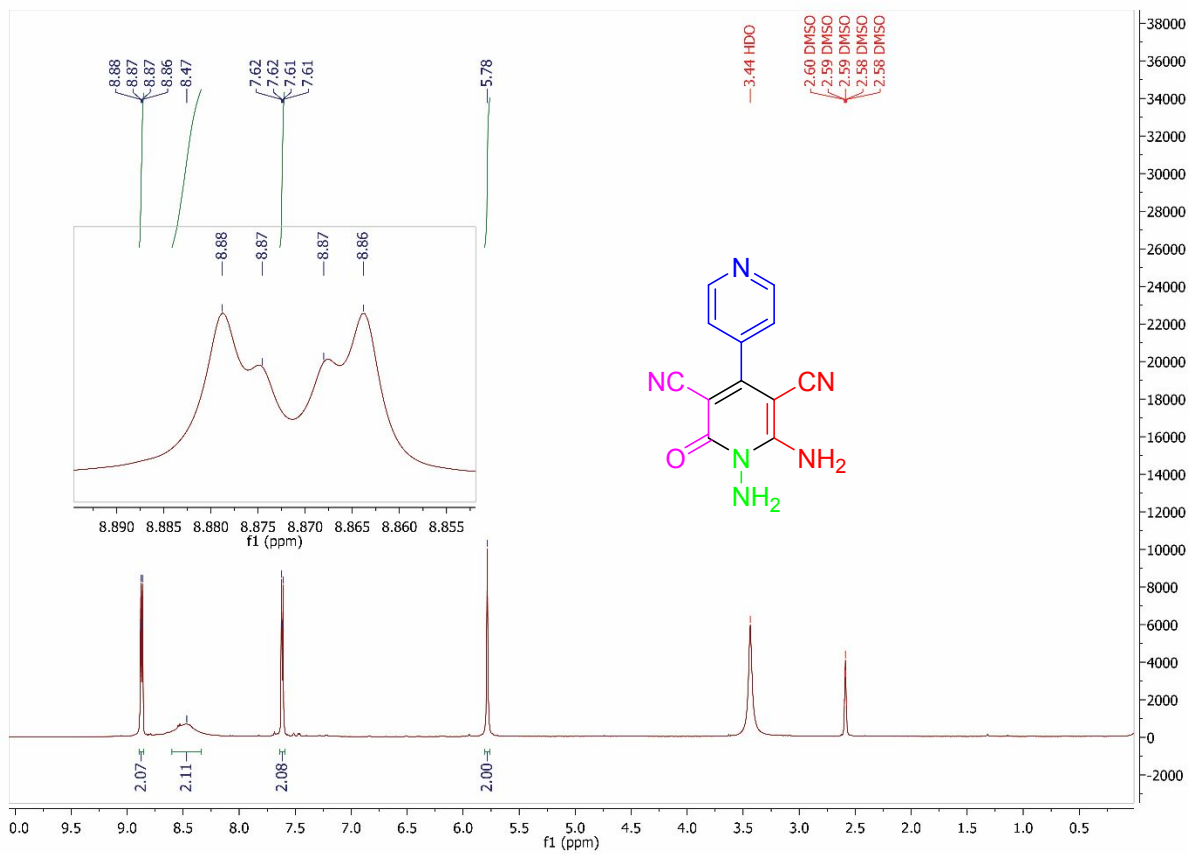

Figure S7:  $^1\text{H}$  NMR spectrum of 1,6-diamino-2-oxo-1,2-dihydro-[4,4'-bipyridine]-3,5-dicarbonitrile (6g)

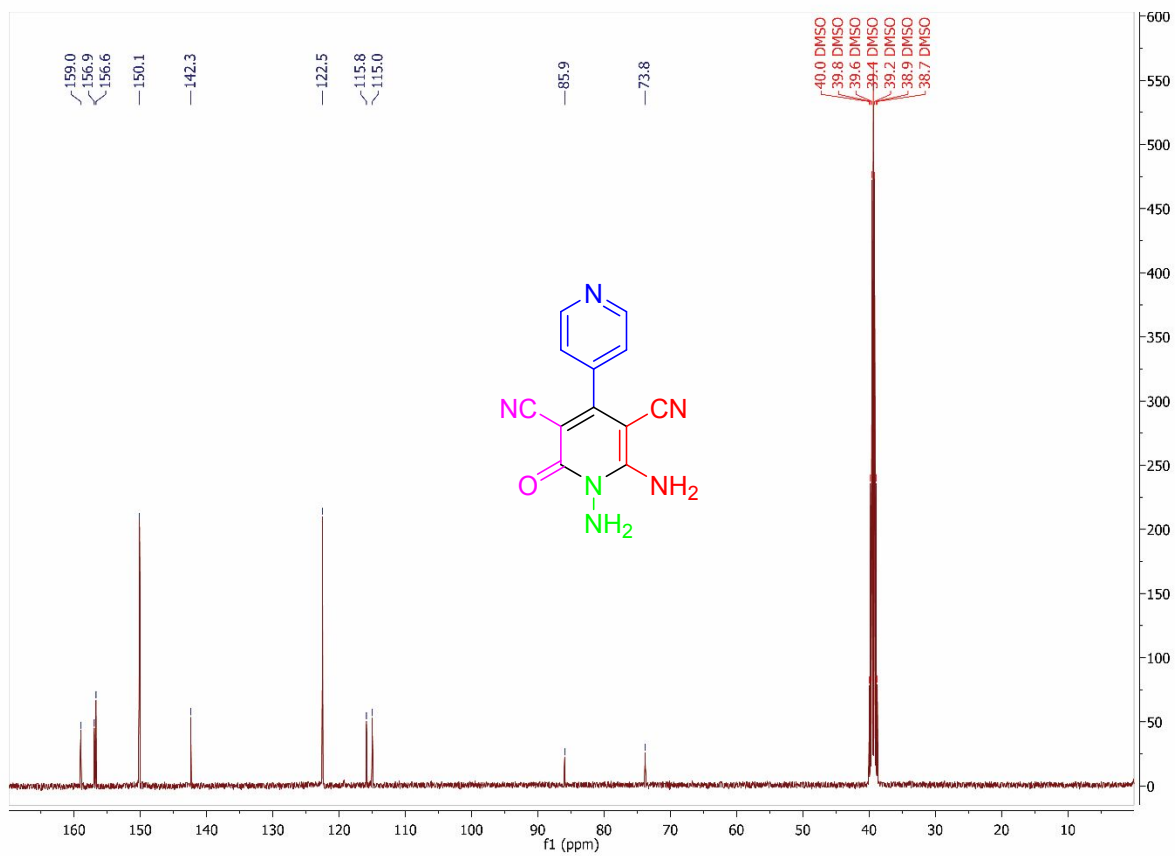

Figure S8:  $^{13}\text{C}$  NMR spectrum of 1,6-diamino-2-oxo-1,2-dihydro-[4,4'-bipyridine]-3,5-dicarbonitrile (6g)

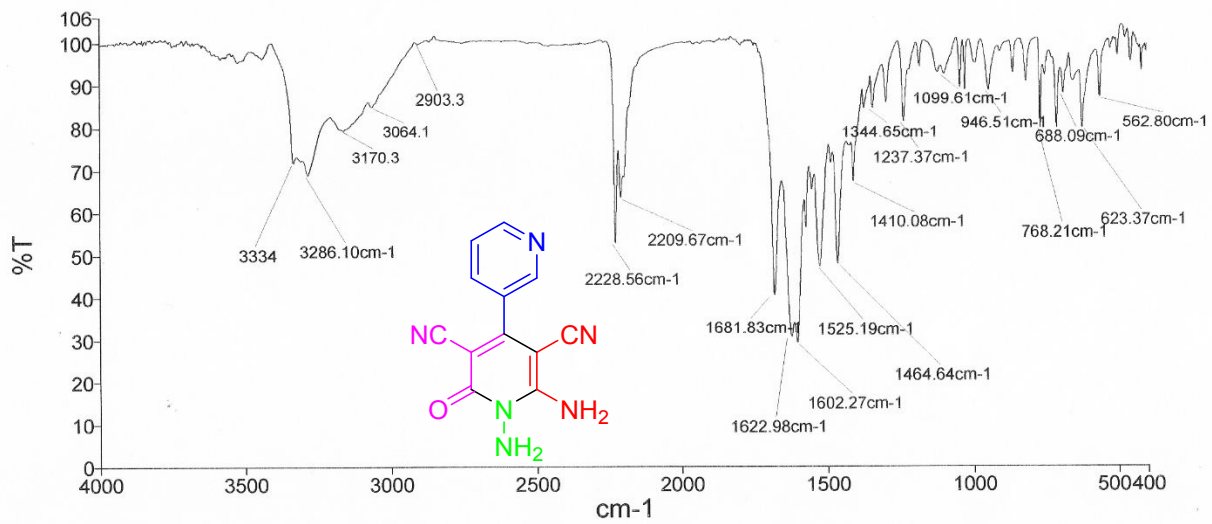

Figure S9: FT-IR spectrum of 1',6'-diamino-2'-oxo-1',2'-dihydro-[3,4'-bipyridine]-3',5'-dicarbonitrile (6h)

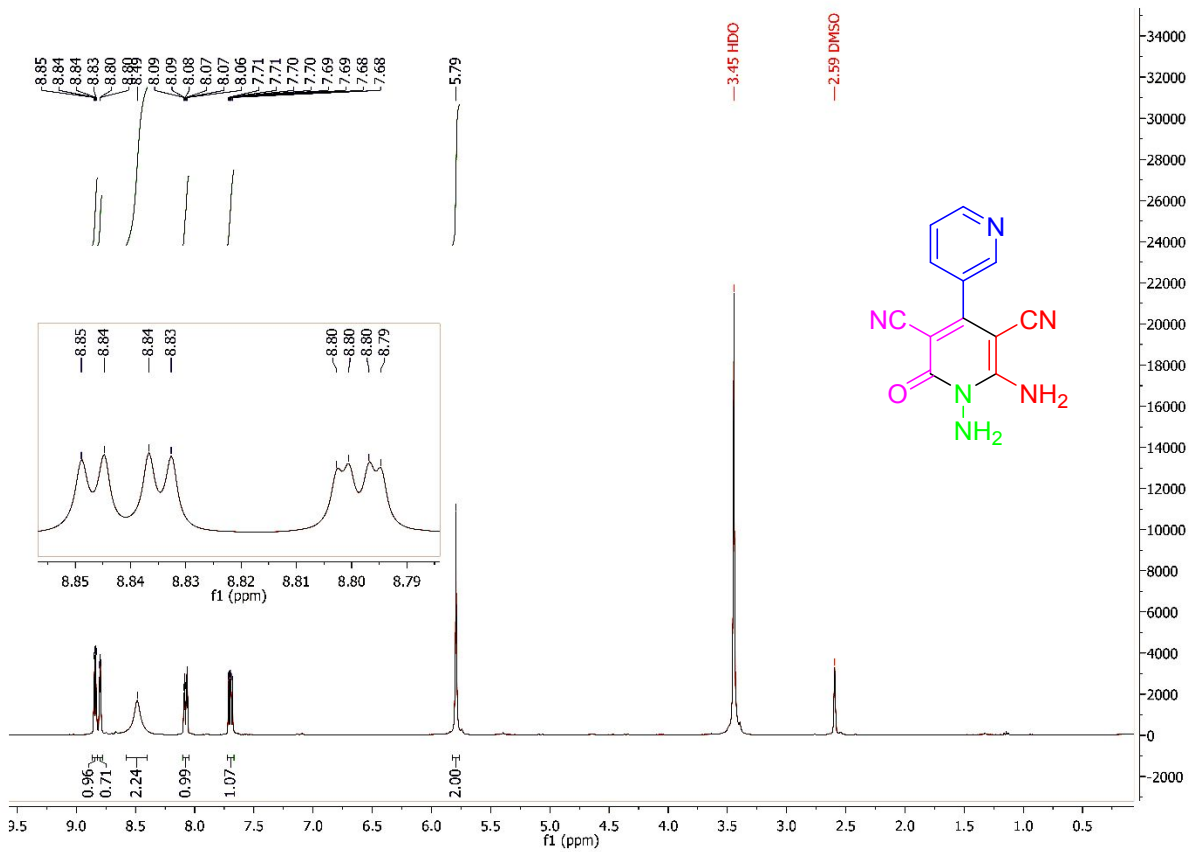

Figure S10:  $^1\text{H}$  NMR spectrum of 1',6'-diamino-2'-oxo-1',2'-dihydro-[3,4'-bipyridine]-3',5'-dicarbonitrile (6h)



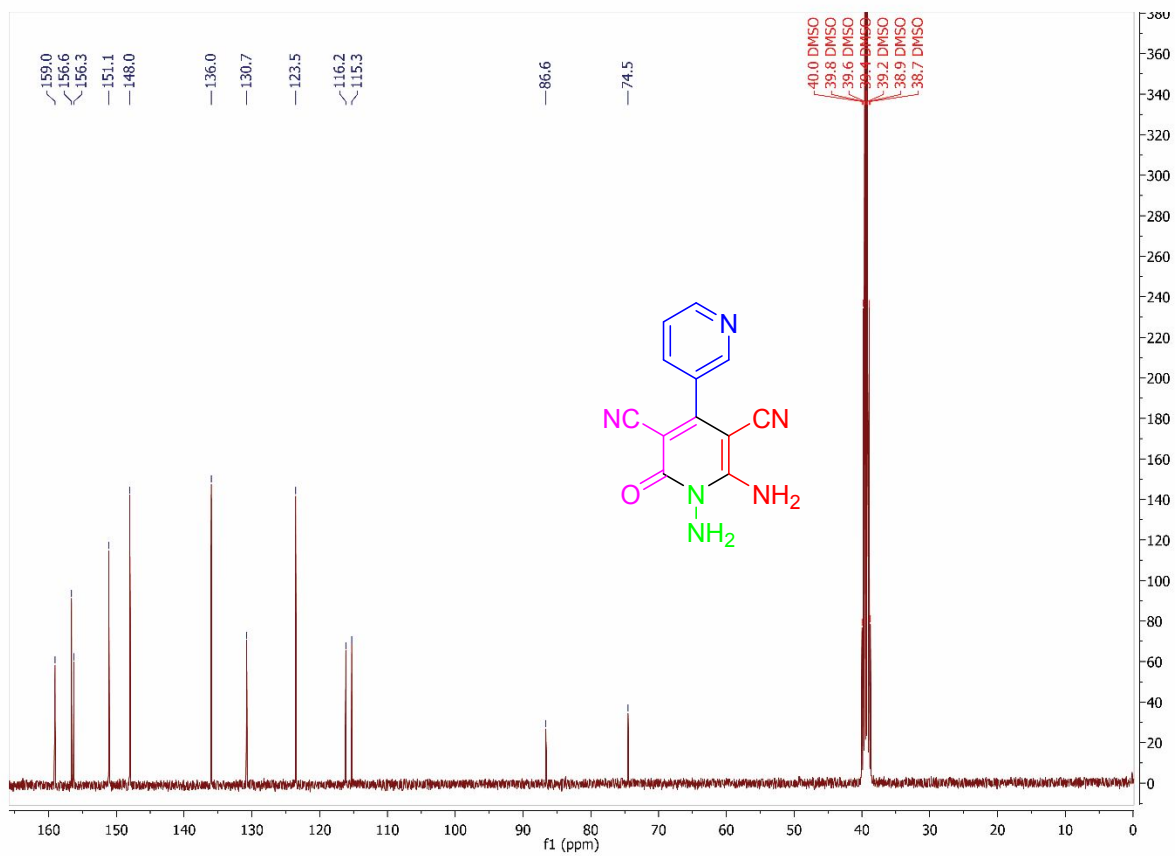

Figure S11: <sup>13</sup>C NMR spectrum of 1',6'-diamino-2'-oxo-1',2'-dihydro-[3,4'-bipyridine]-3',5'-dicarbonitrile (6h)

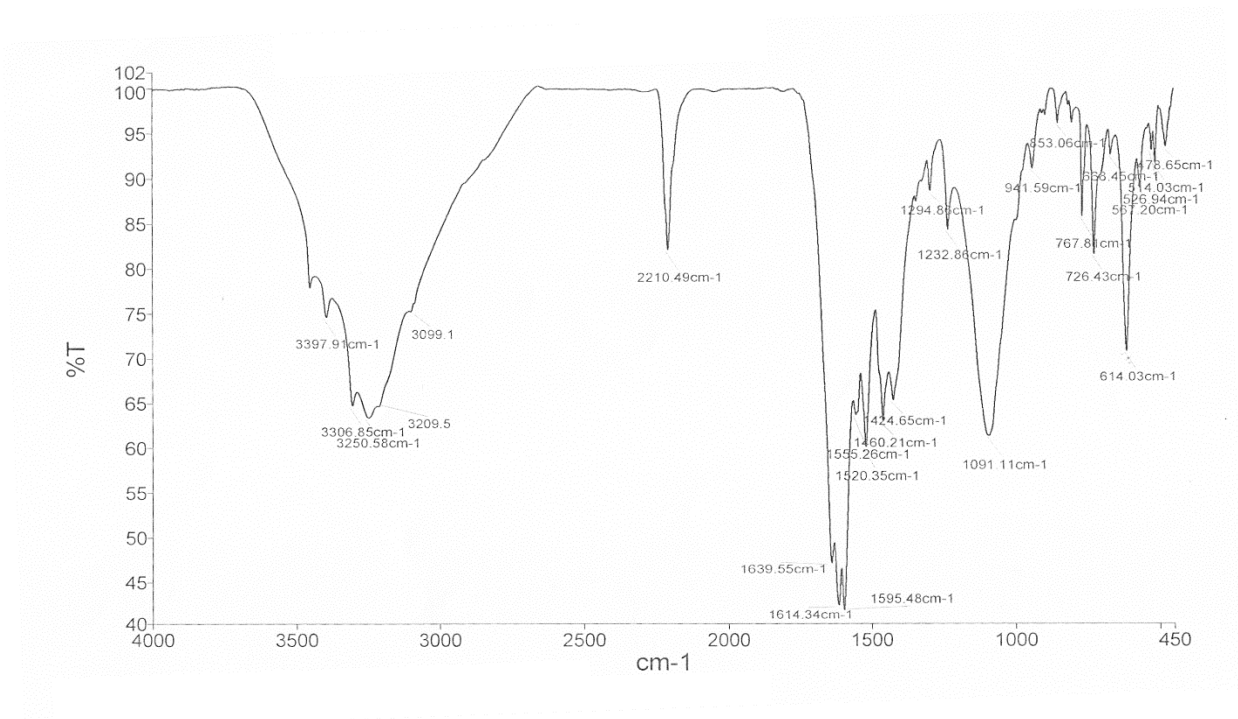

Figure S12: FT-IR spectrum of 1,6-diamino-2-oxo-4-(thiophen-2-yl)-1,2-dihydropyridine-3,5-dicarbonitrile (6i)

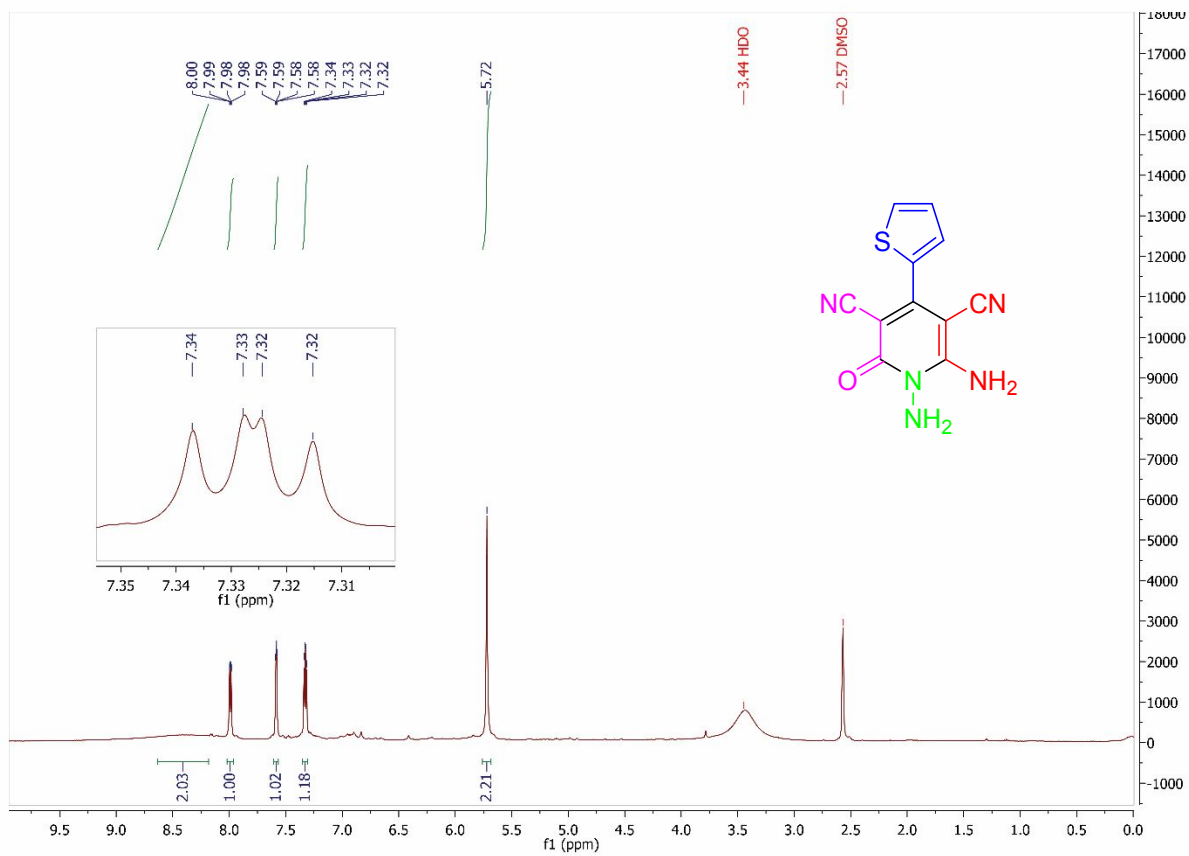

Figure S13: <sup>1</sup>H NMR spectrum of 1,6-diamino-2-oxo-4-(thiophen-2-yl)-1,2-dihydropyridine-3,5-dicarbonitrile (6i)

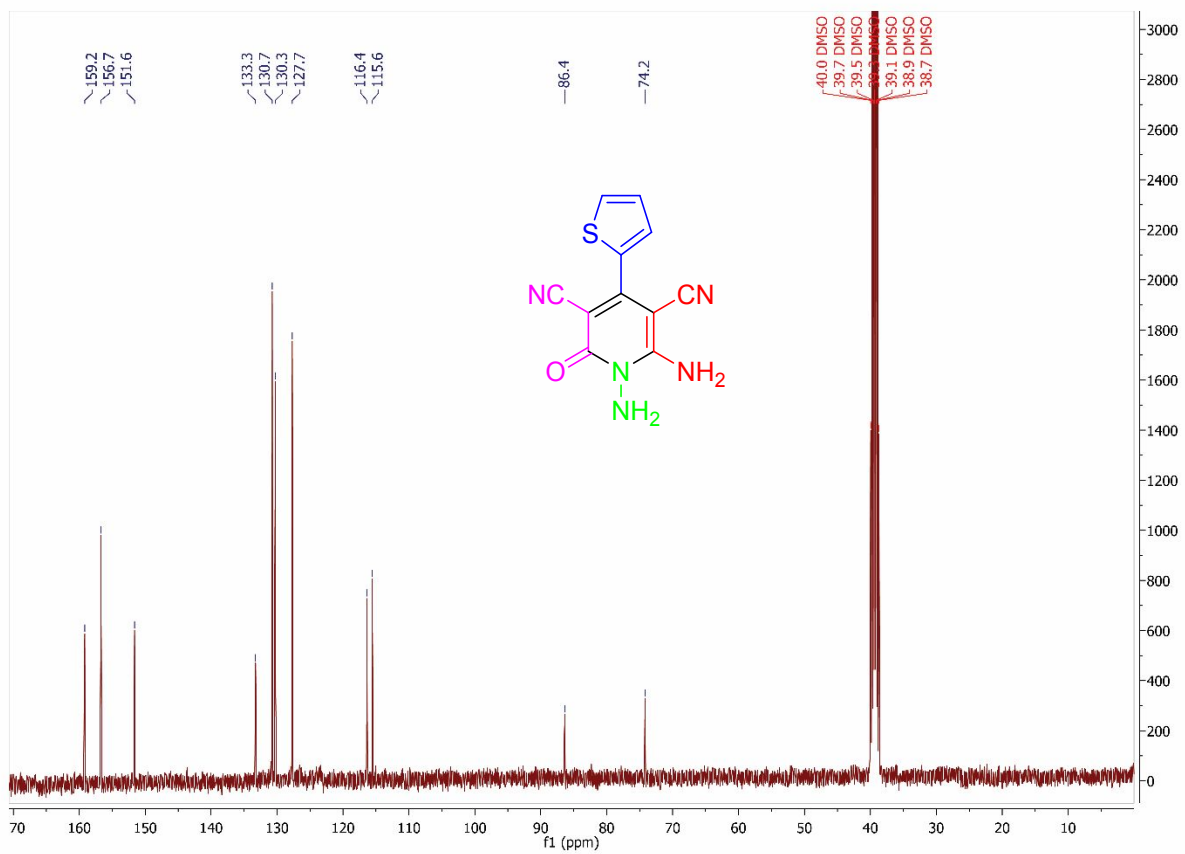

Figure S14:  $^{13}\text{C}$  NMR spectrum of 1,6-diamino-2-oxo-4-(thiophen-2-yl)-1,2-dihydropyridine-3,5-dicarbonitrile (6i)

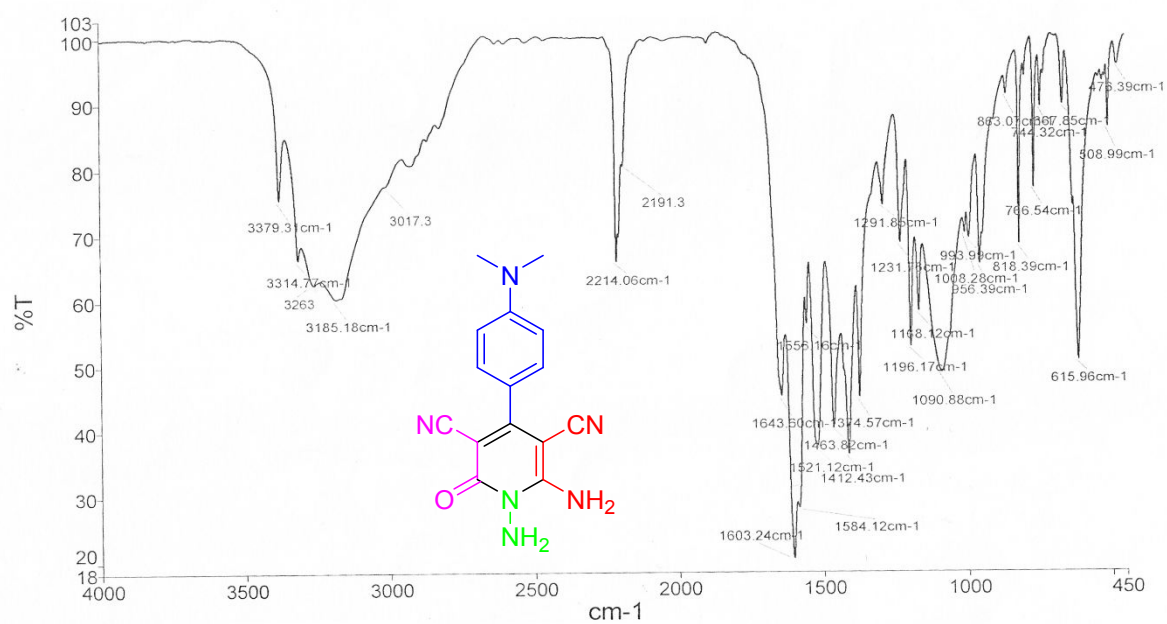

Figure S15: FT-IR spectrum of 1,6-diamino-4-(4-(dimethylamino)phenyl)-2-oxo-1,2-dihydropyridine-3,5-dicarbonitrile (6k)

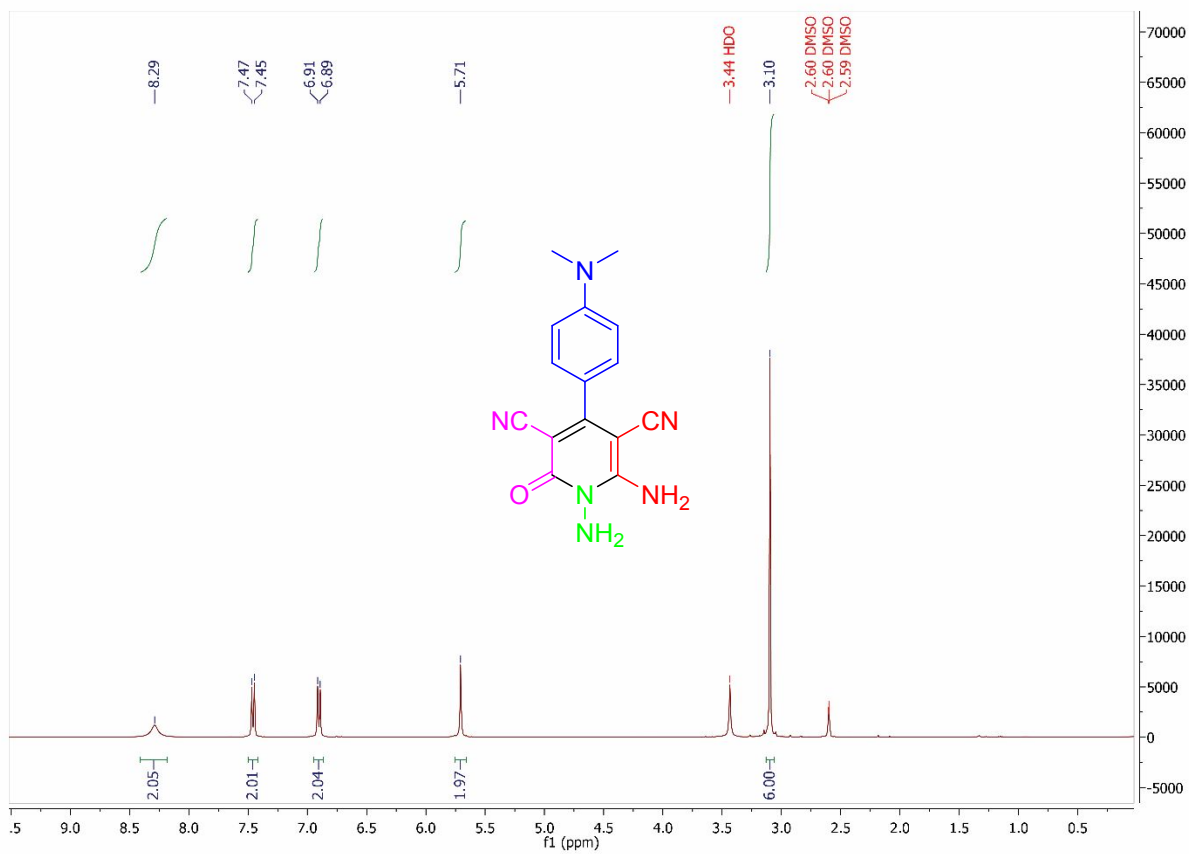

Figure S16: <sup>1</sup>H NMR spectrum of 1,6-diamino-4-(4-(dimethylamino)phenyl)-2-oxo-1,2-dihydropyridine-3,5-dicarbonitrile (6k)

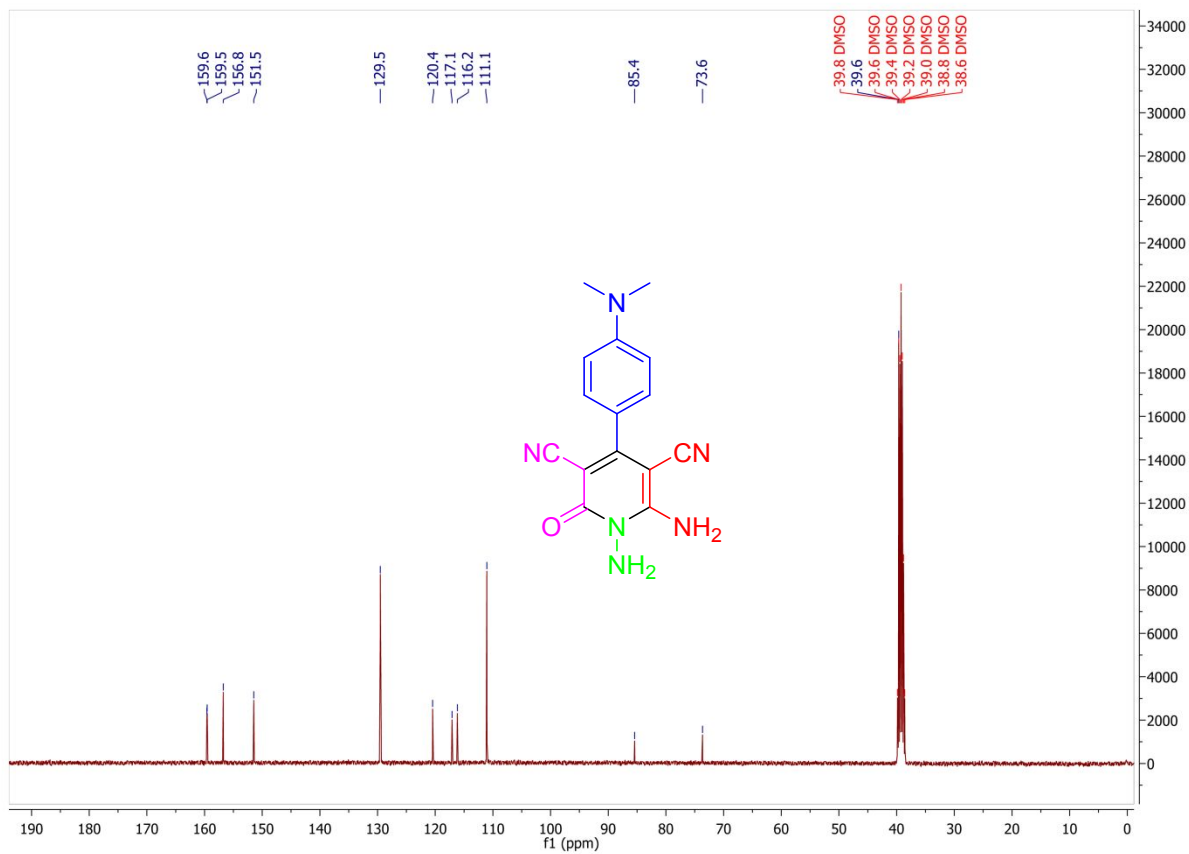

Figure S17: <sup>13</sup>C NMR spectrum of 1,6-diamino-4-(4-(dimethylamino)phenyl)-2-oxo-1,2-dihydropyridine-3,5-dicarbonitrile (6k)

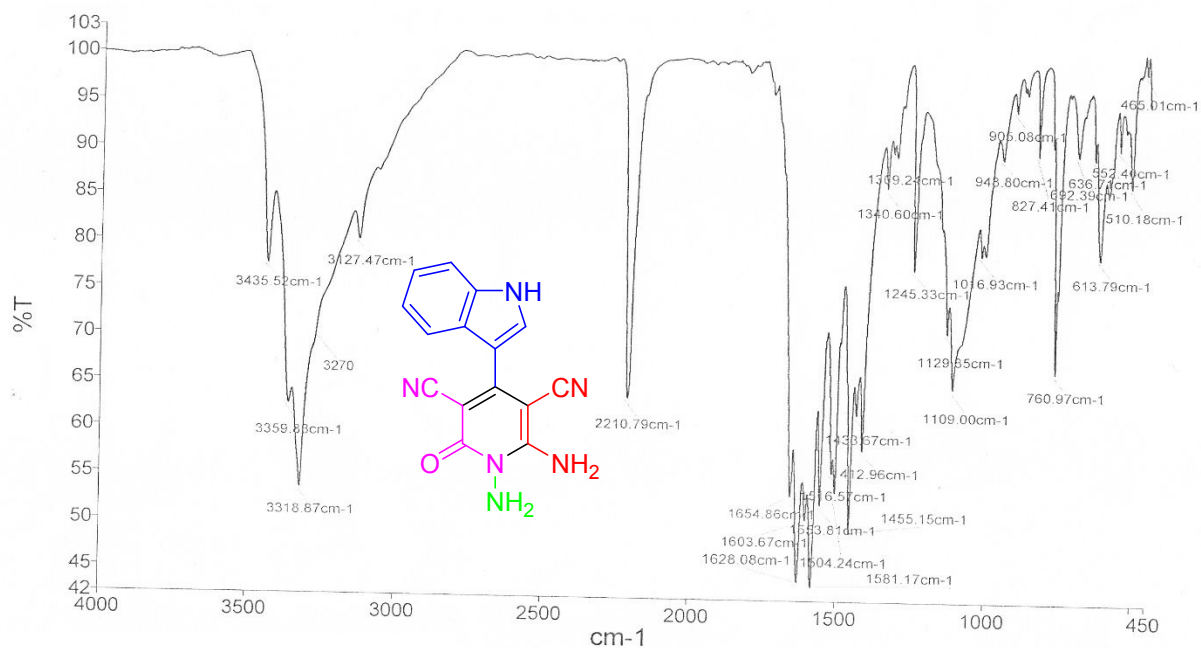

Figure S18: FT-IR spectrum of 1,6-diamino-4-(1H-indol-3-yl)-2-oxo-1,2-dihydropyridine-3,5-dicarbonitrile (6l)



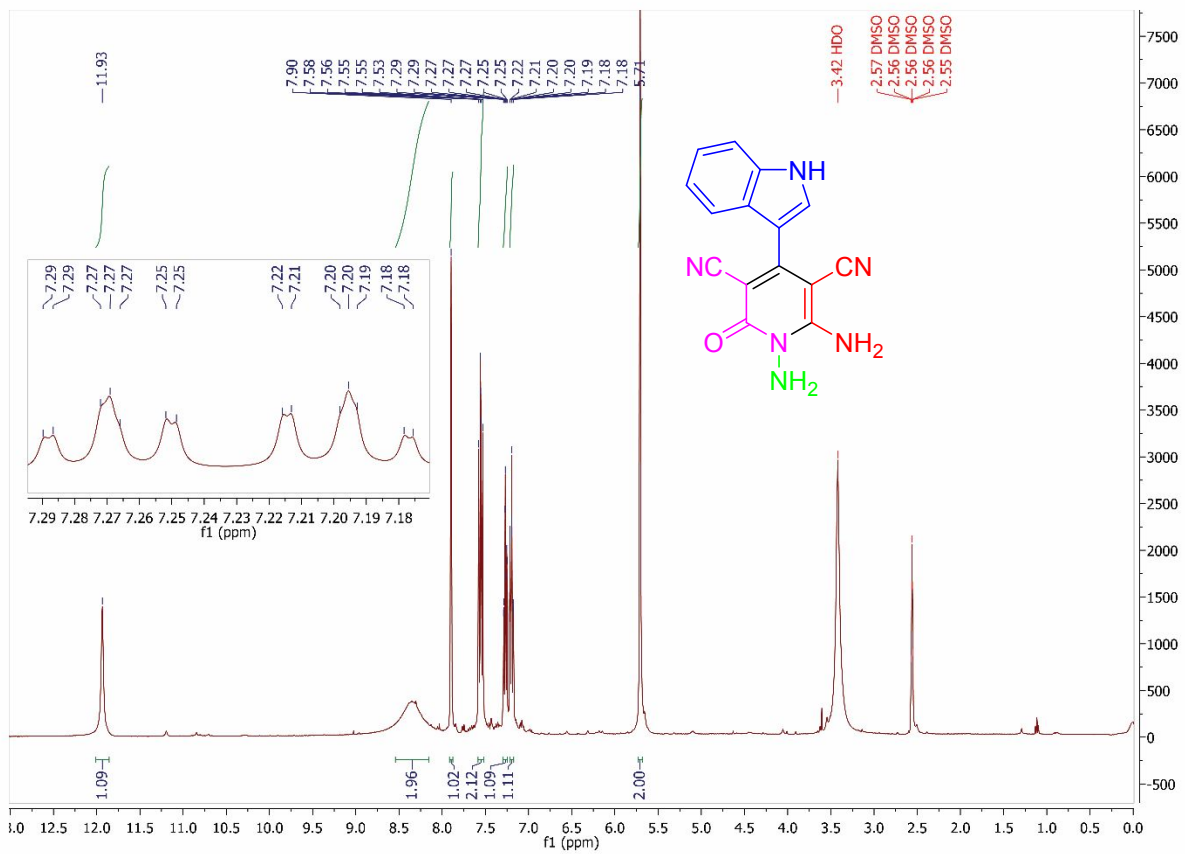

Figure S19: <sup>1</sup>H NMR spectrum of 1,6-diamino-4-(1H-indol-3-yl)-2-oxo-1,2-dihydropyridine-3,5-dicarbonitrile (6l)

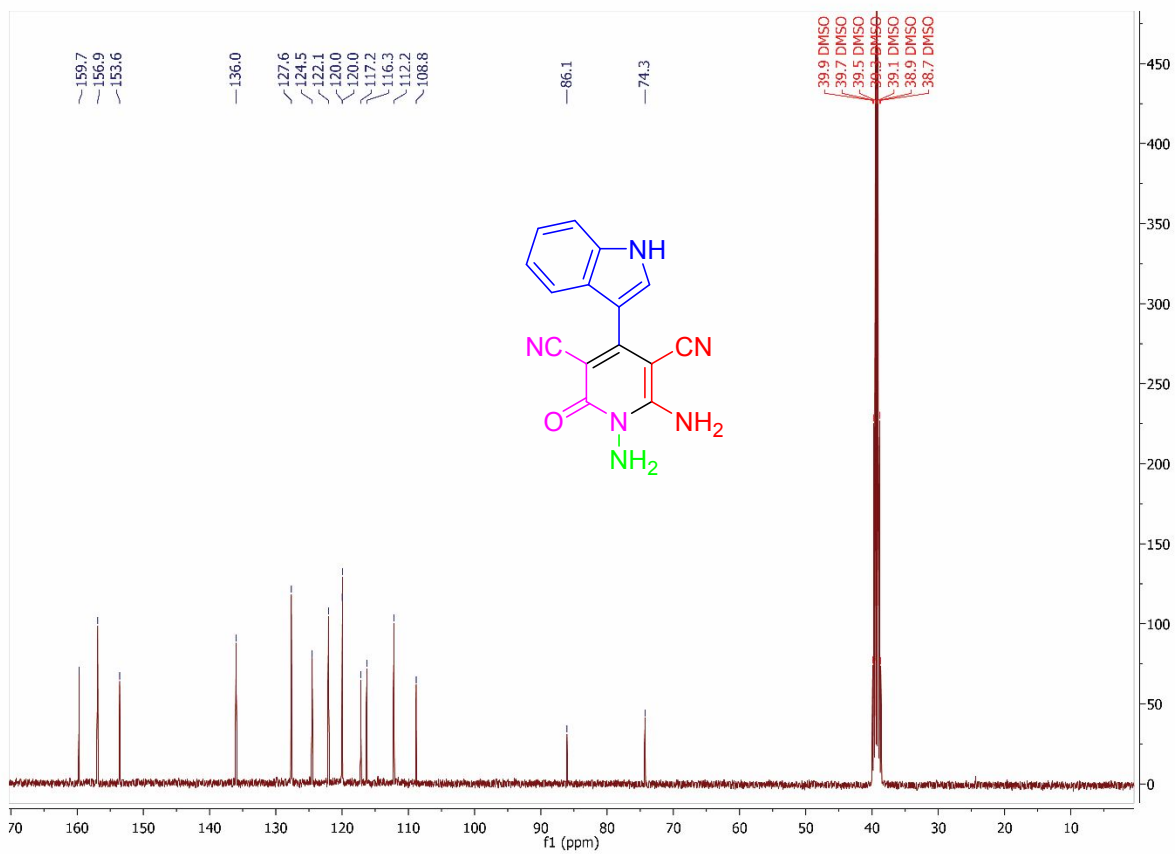

Figure S20: <sup>13</sup>C NMR spectrum of 1,6-diamino-4-(1H-indol-3-yl)-2-oxo-1,2-dihydropyridine-3,5-dicarbonitrile (6l)

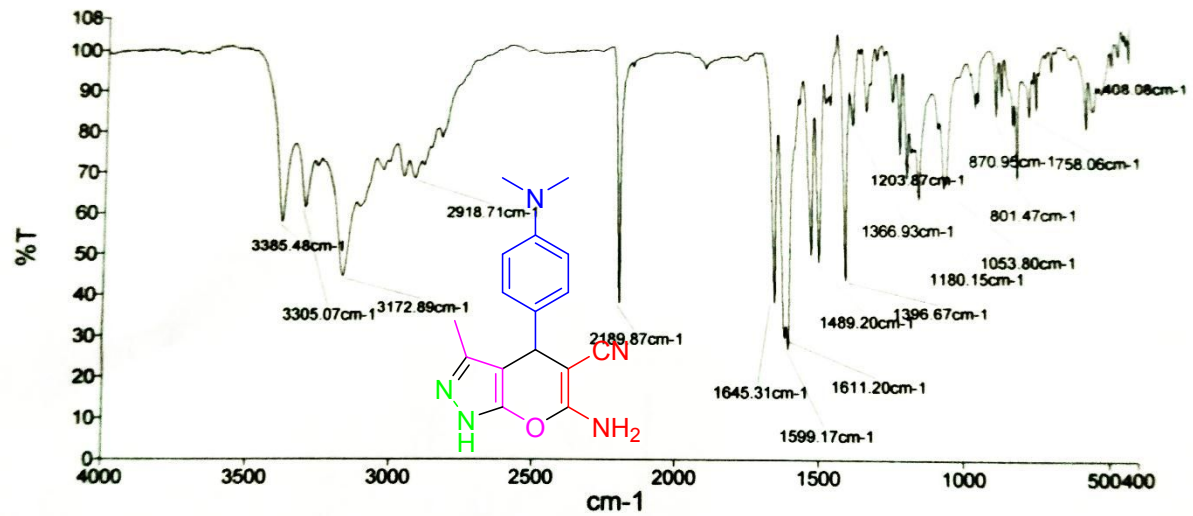

Figure S21: FT-IR spectrum of 6-amino-4-(4-(dimethylamino)phenyl)-3-methyl-1,4-dihydropyrano[2,3-c]pyrazole-5-carbonitrile (7g)

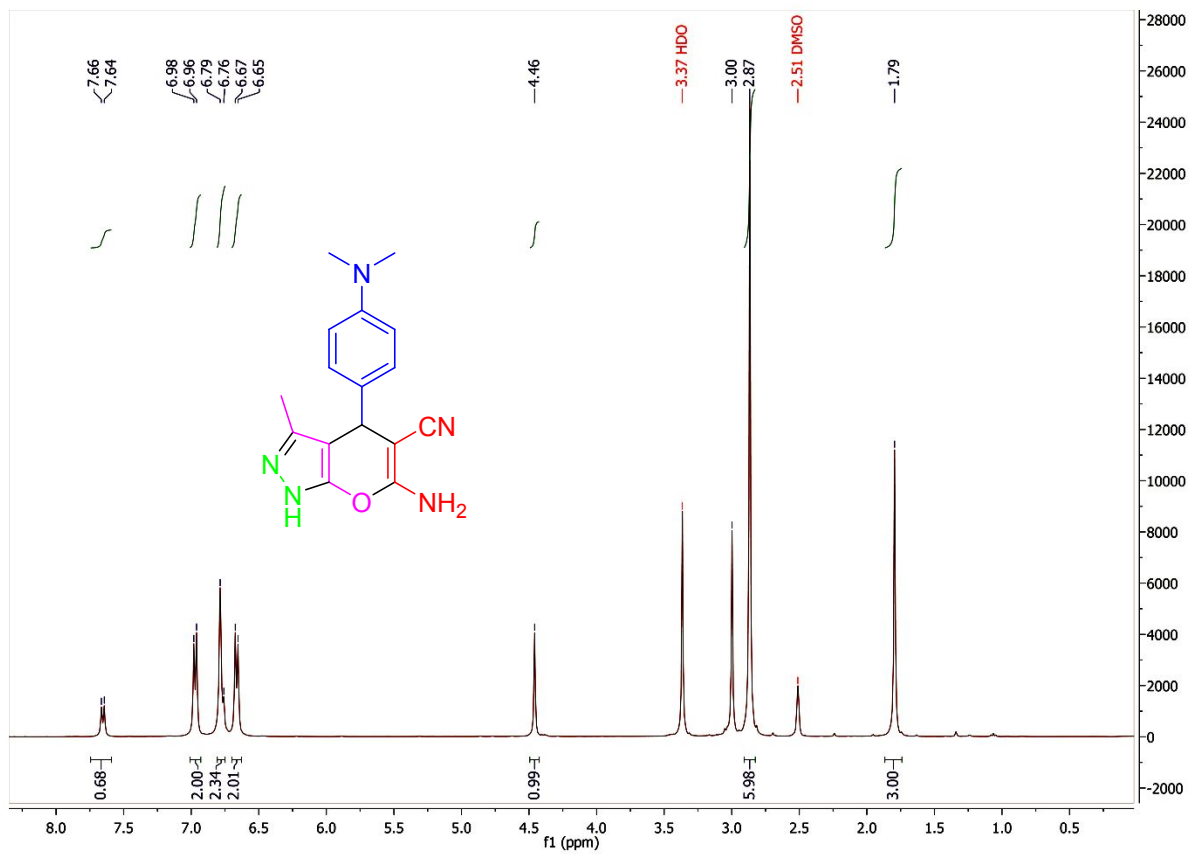

Figure S22: <sup>1</sup>H NMR spectrum of 6-amino-4-(4-(dimethylamino)phenyl)-3-methyl-1,4-dihydropyrano[2,3-c]pyrazole-5-carbonitrile (7g)

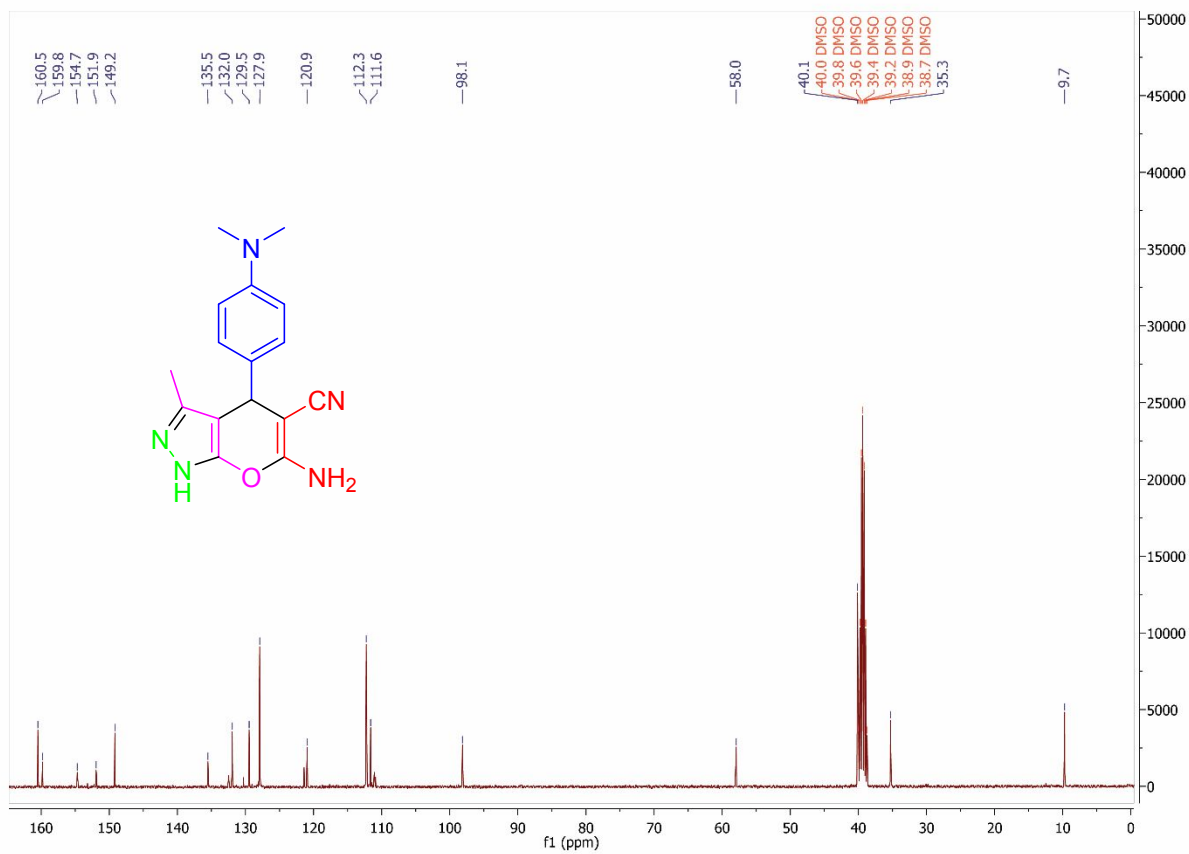

Figure S23: <sup>13</sup>C NMR spectrum of 6-amino-4-(4-(dimethylamino)phenyl)-3-methyl-1,4-dihydropyranopyrazole-5-carbonitrile (7g)

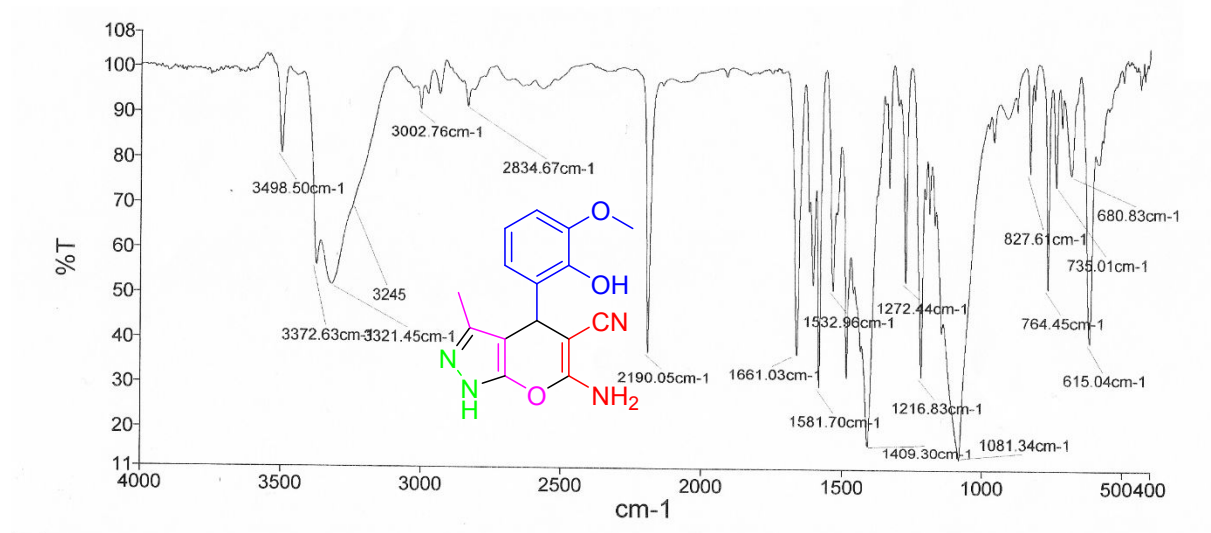

Figure S24: FT-IR spectrum of 6-amino-4-(2-hydroxy-3-methoxyphenyl)-3-methyl-1,4-dihydropyrano[2,3-c]pyrazole-5-carbonitrile (7m)

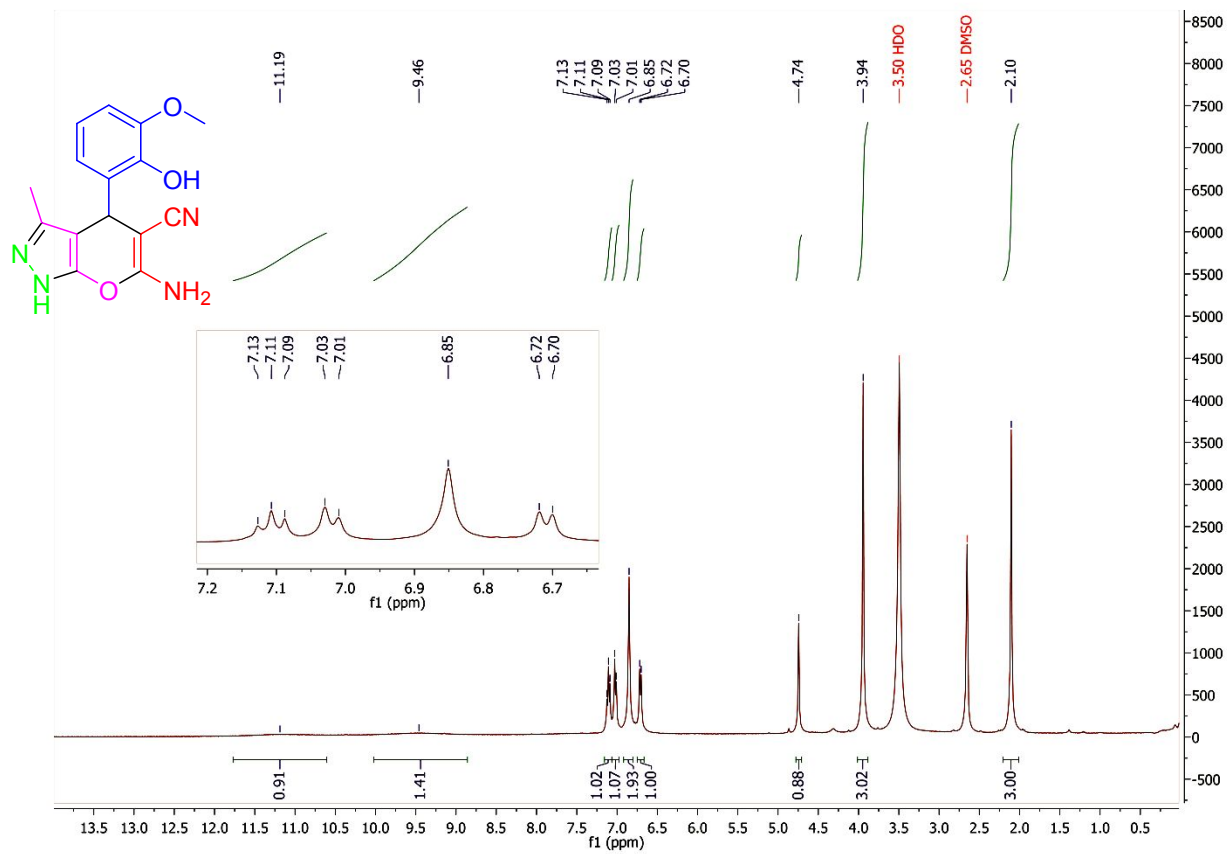

Figure S25: <sup>1</sup>H NMR spectrum of 6-amino-4-(2-hydroxy-3-methoxyphenyl)-3-methyl-1,4-dihydropyrano[2,3-c]pyrazole-5-carbonitrile (7m)

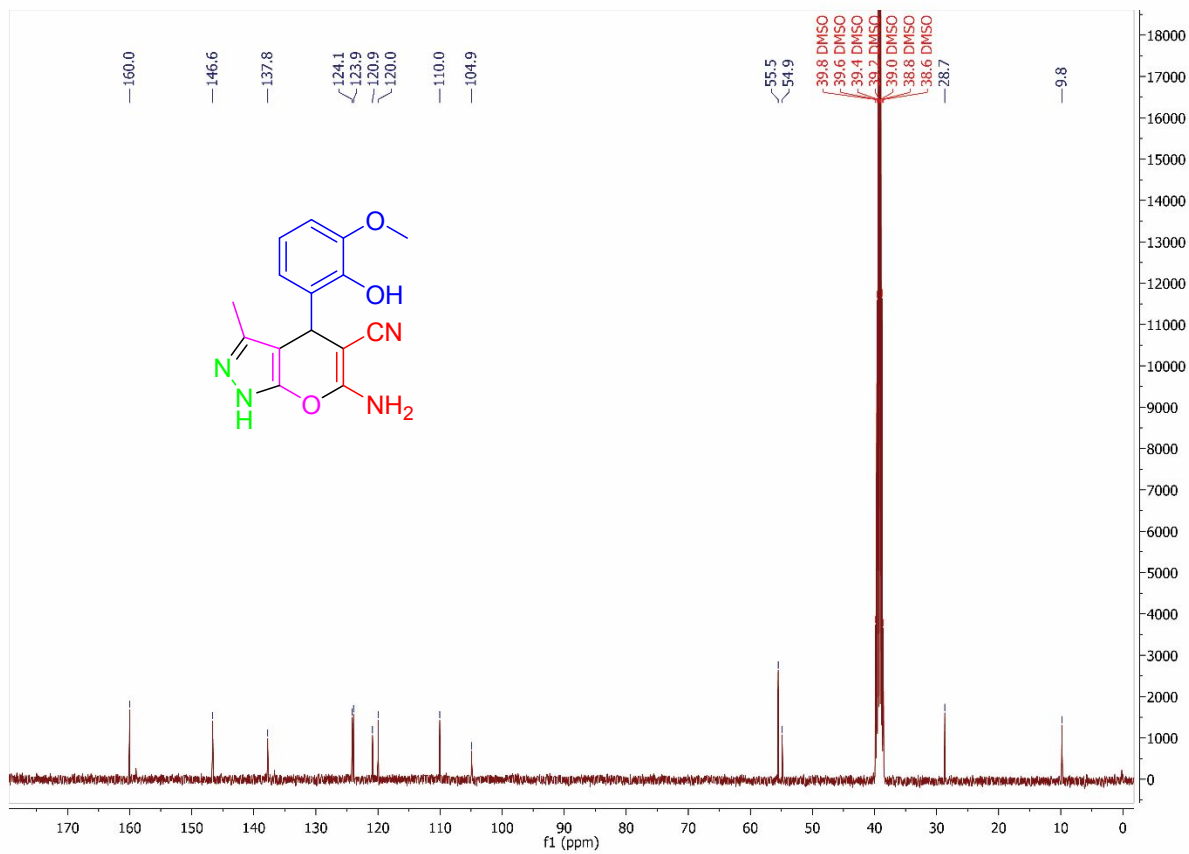

Figure S26: <sup>13</sup>C NMR spectrum of 6-amino-4-(2-hydroxy-3-methoxyphenyl)-3-methyl-1,4-dihydropyrano[2,3-c]pyrazole-5-carbonitrile (7m)
